# Supplementary material for: Targeted in situ cross-linking mass spectrometry and integrative modeling reveal the architectures of three proteins from SARS-CoV-2
Source: PubMed Central journal article supplement (PMC8403911; doi:10.1073/pnas.2103554118), 2021-08-09
Supplement: pnas.2103554118.sd05.pdf [file pnas.2103554118.sd05.pdf]

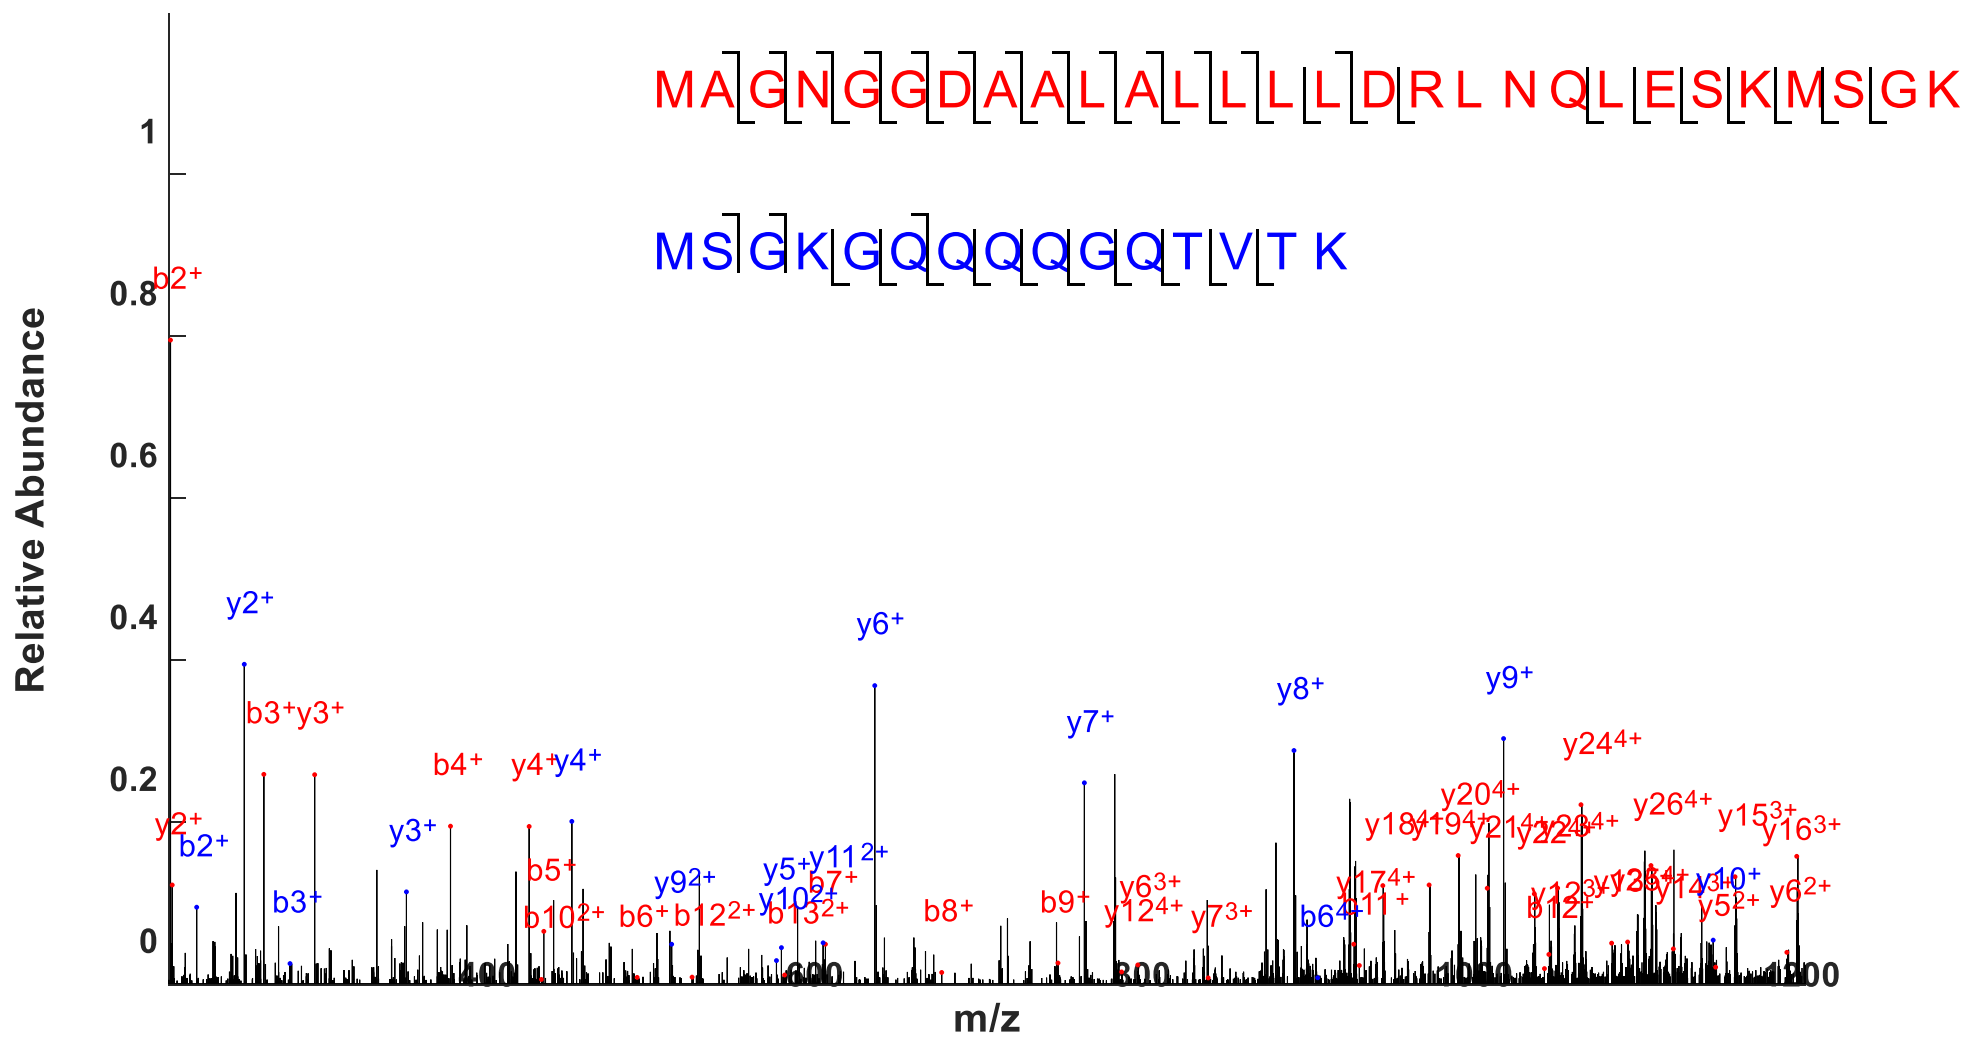

Protein N dimer cross link (1) K233 – K237.

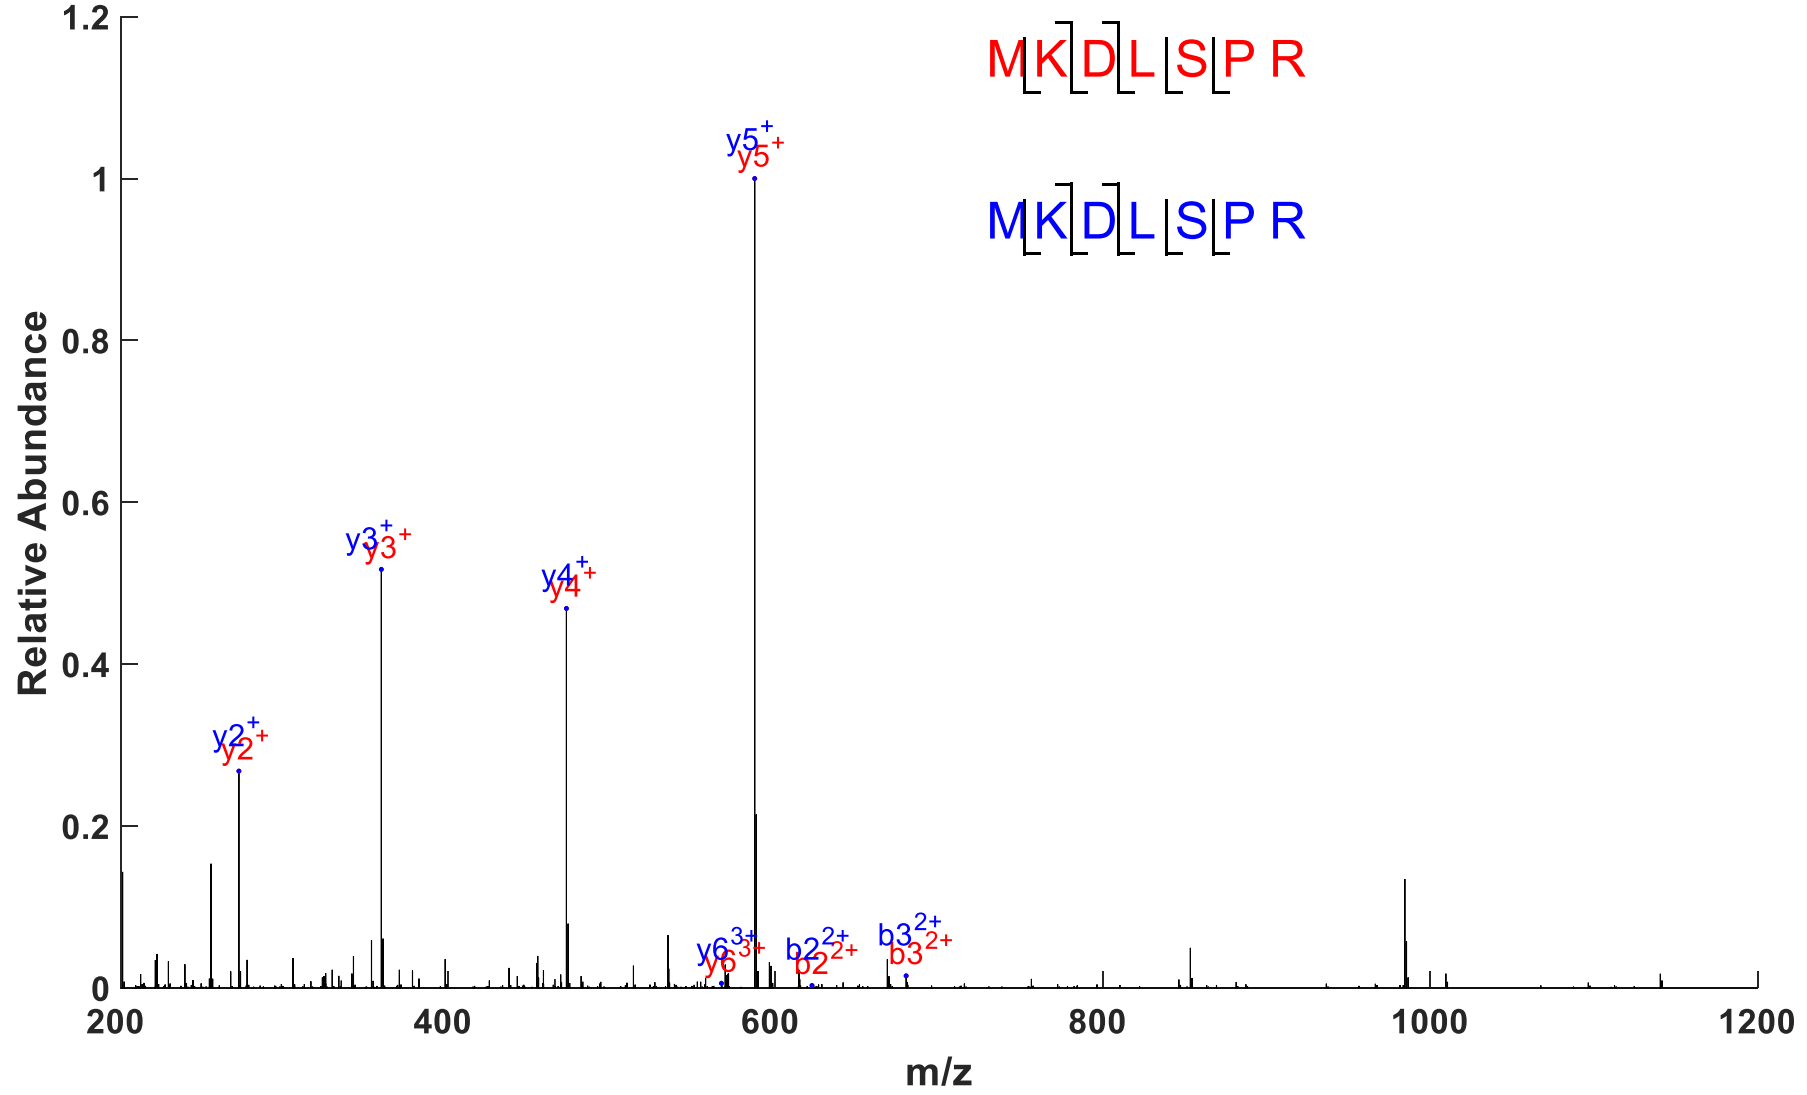

Protein N dimer cross link (2) K102 – K102.

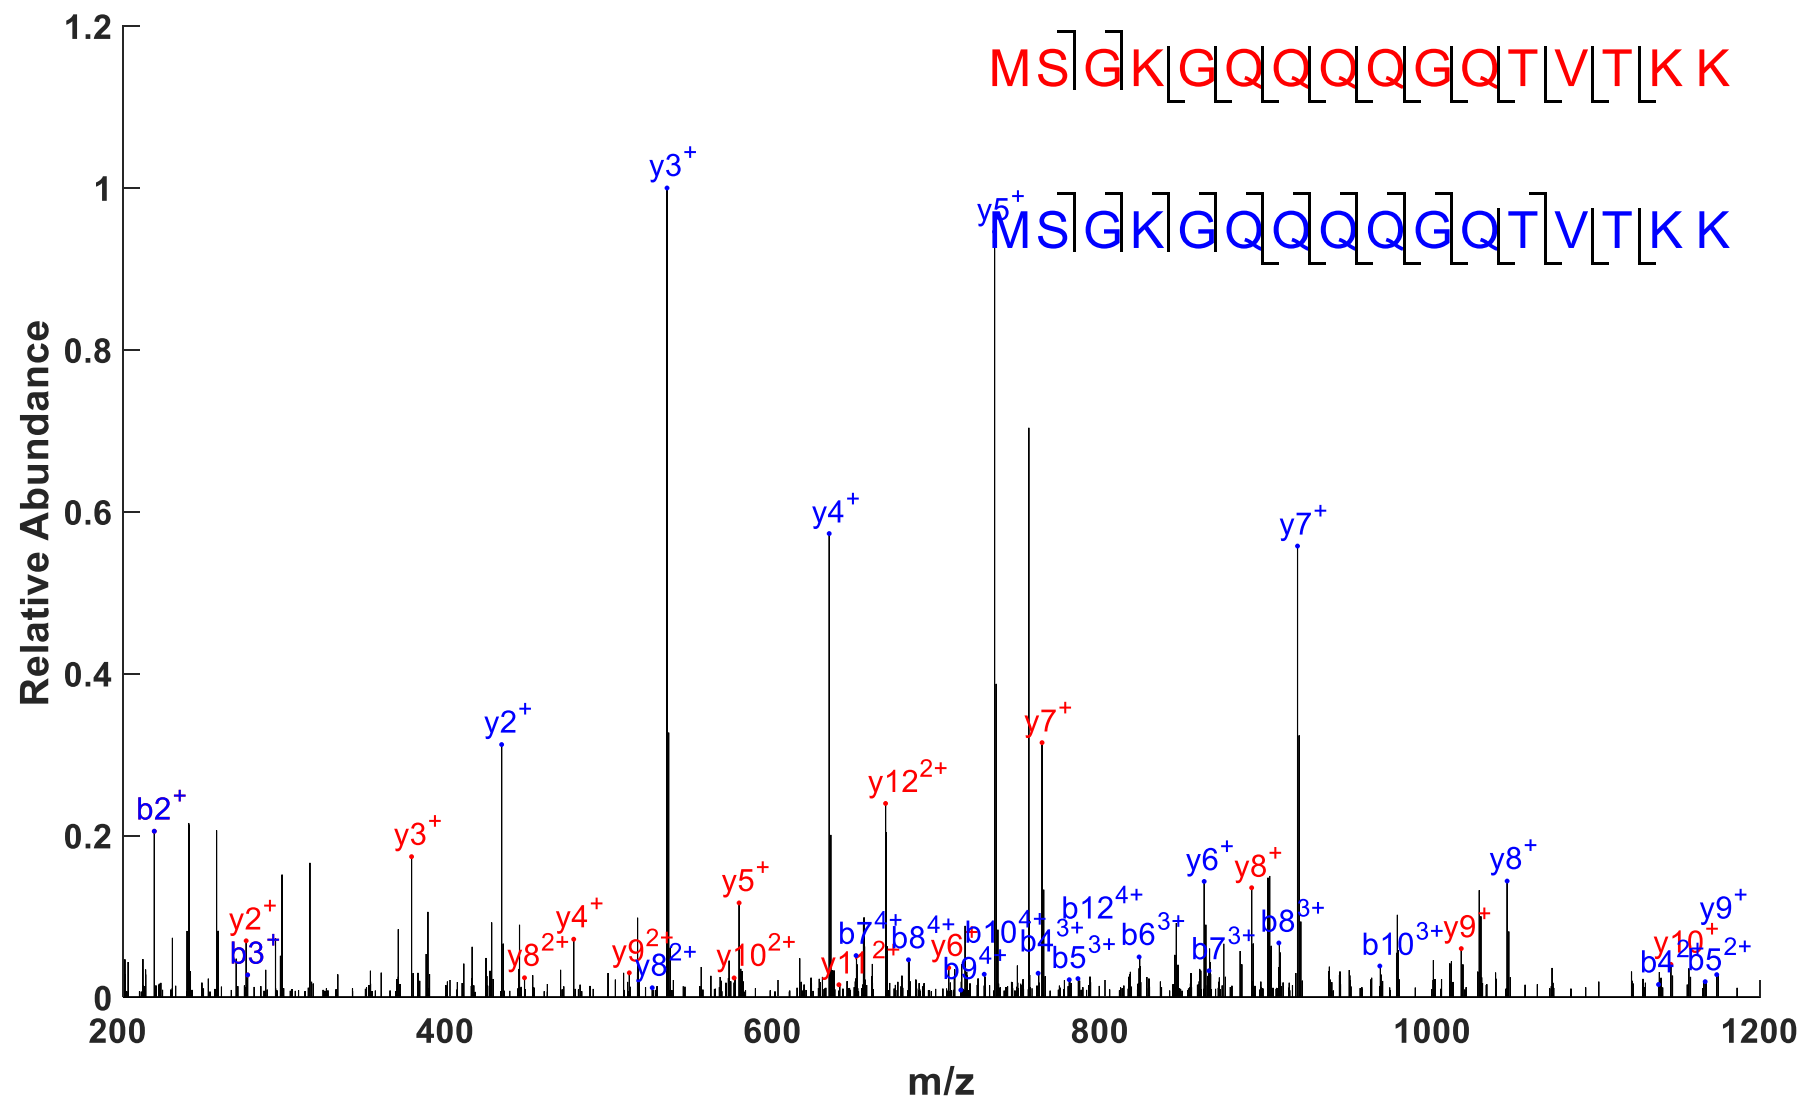

Protein N dimer cross link (3) K237 – K237.

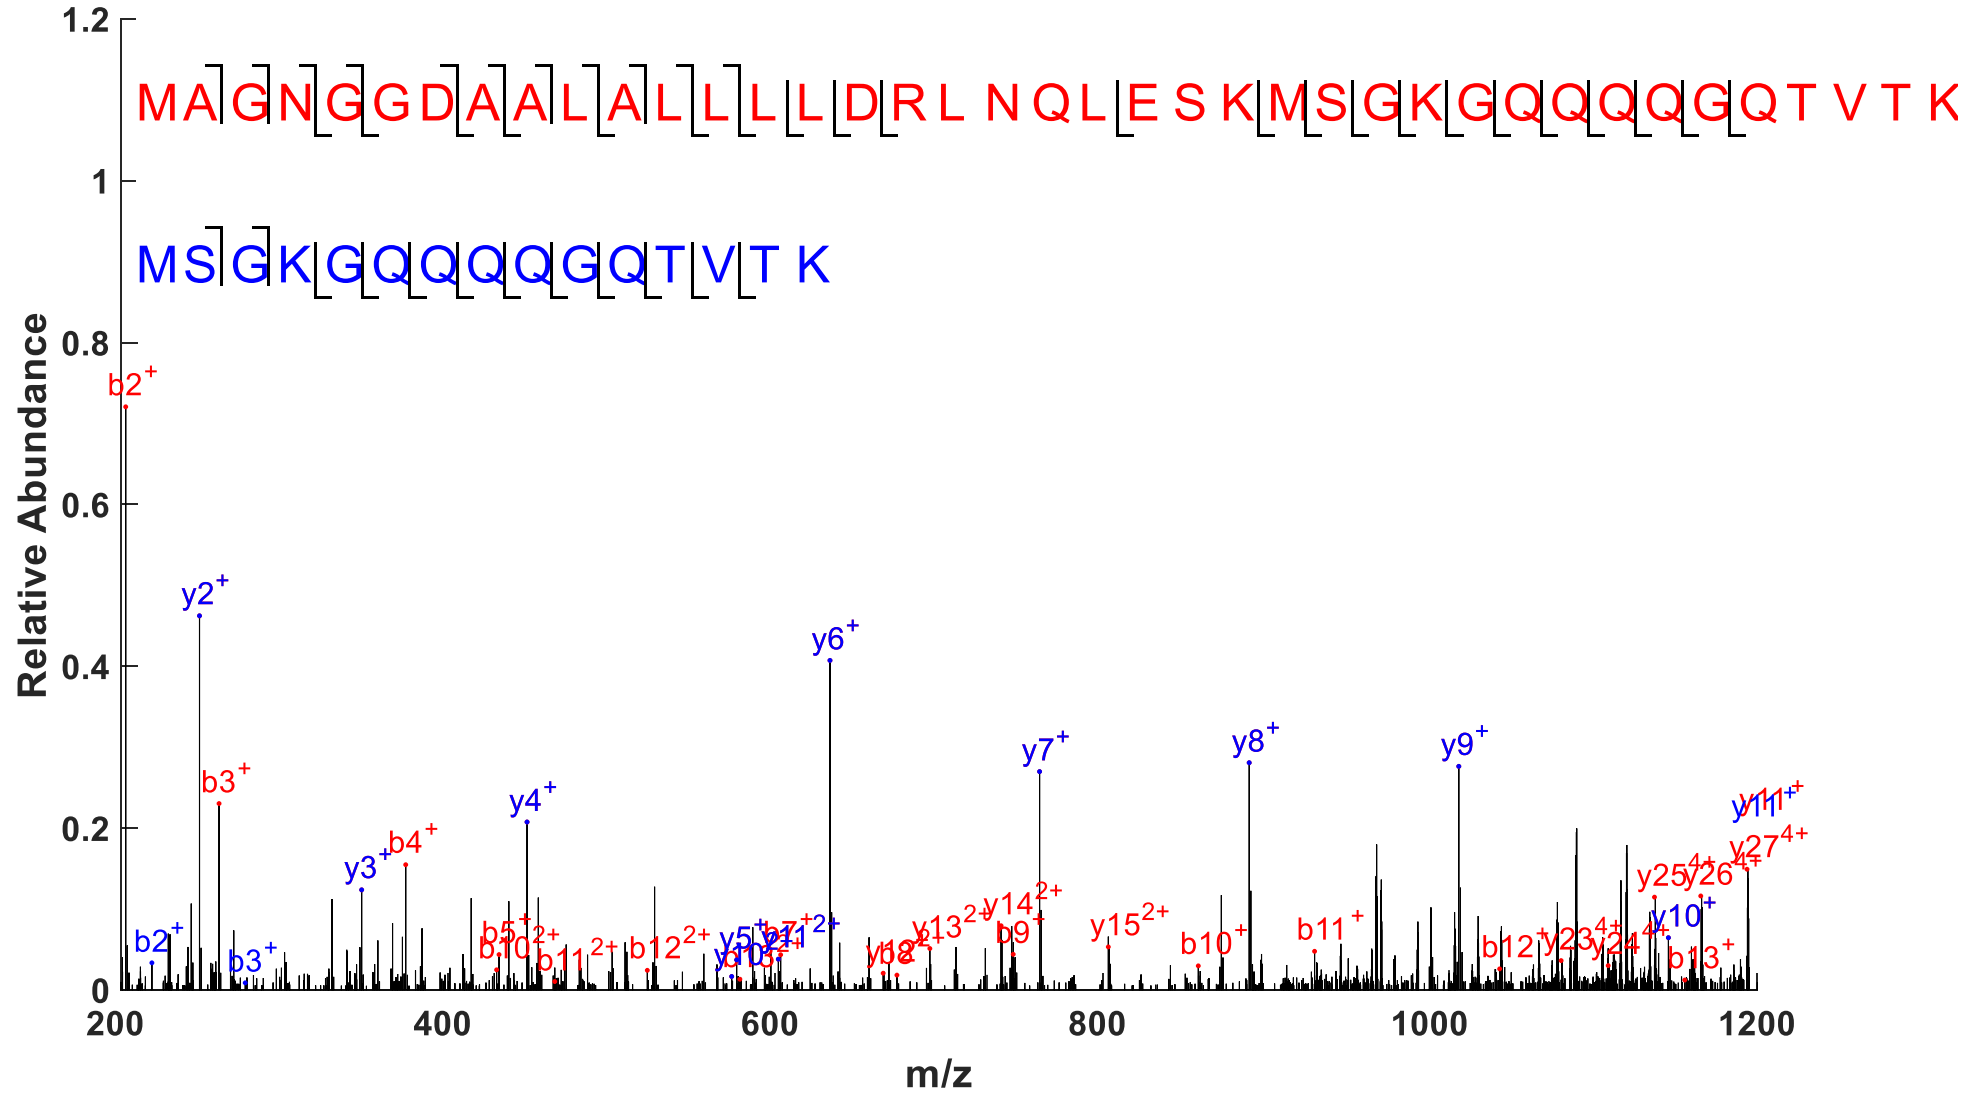

Protein N dimer cross link (4) K233 – K237.

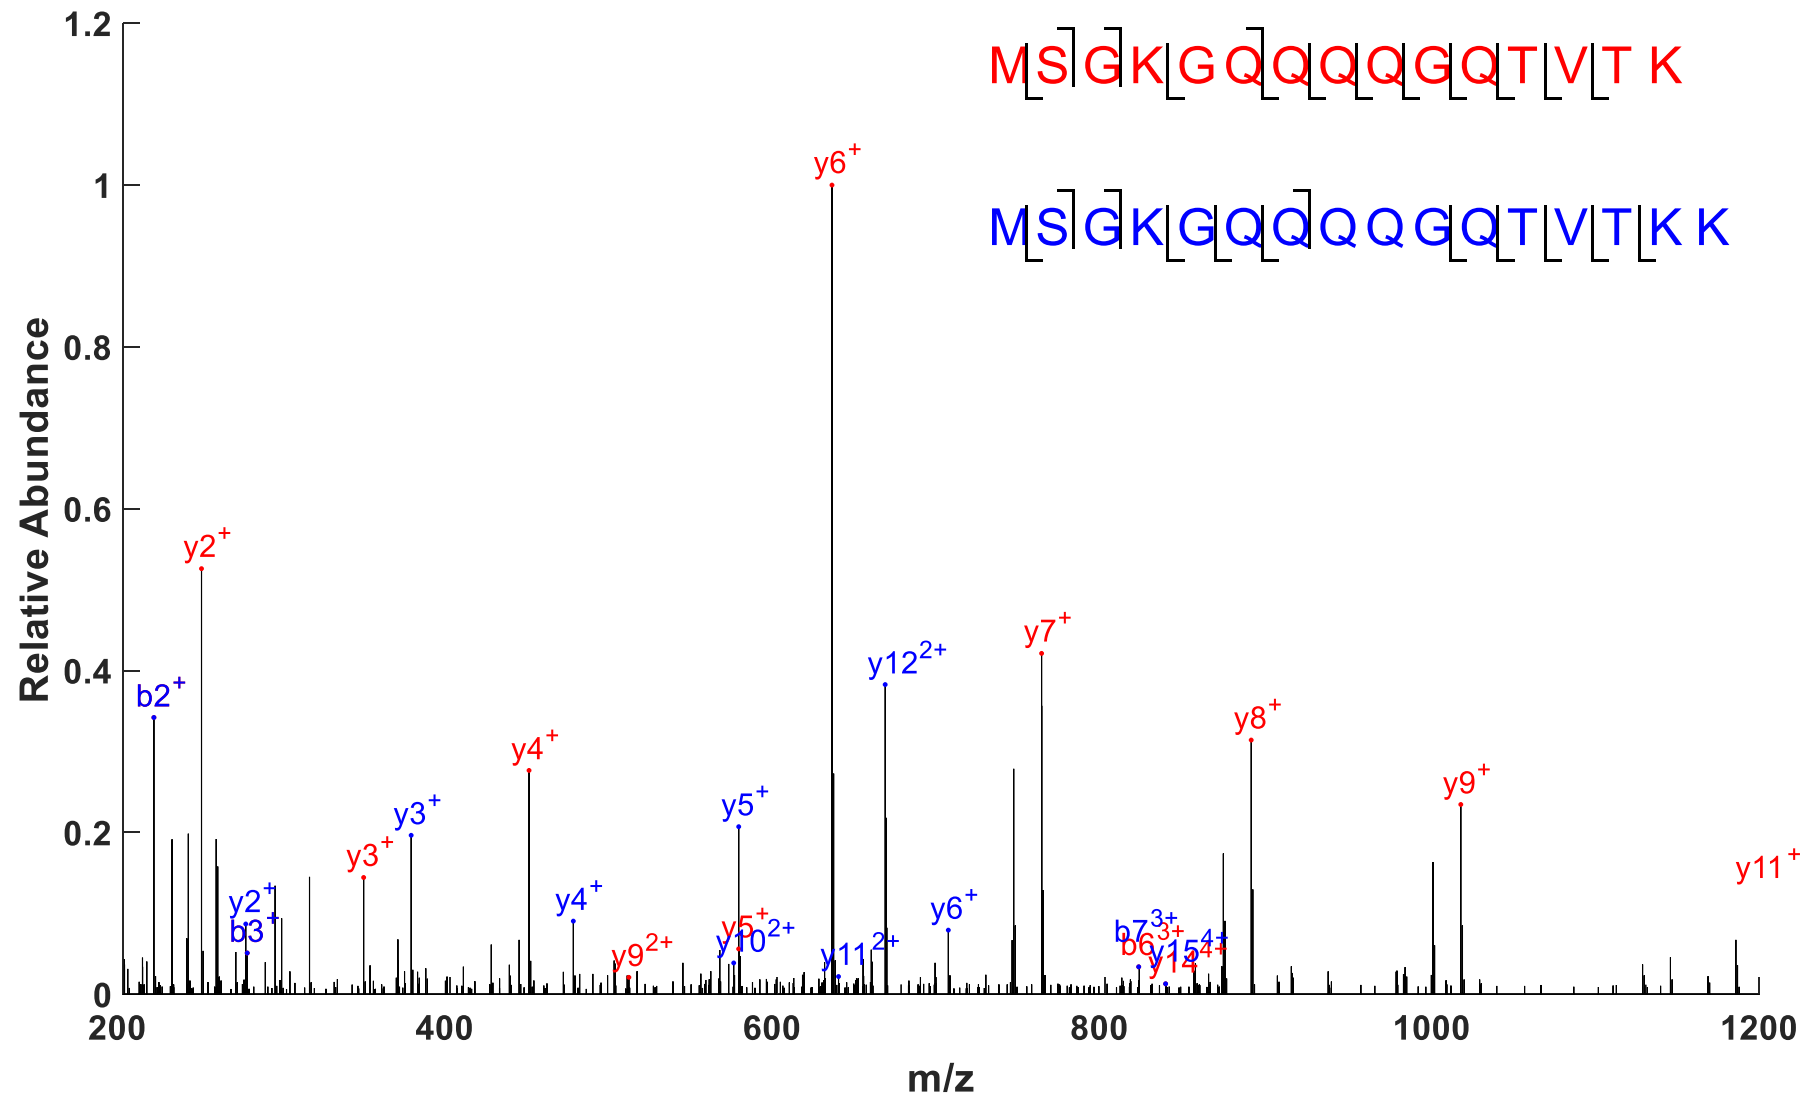

Protein N dimer cross link (5) K237 – K237.

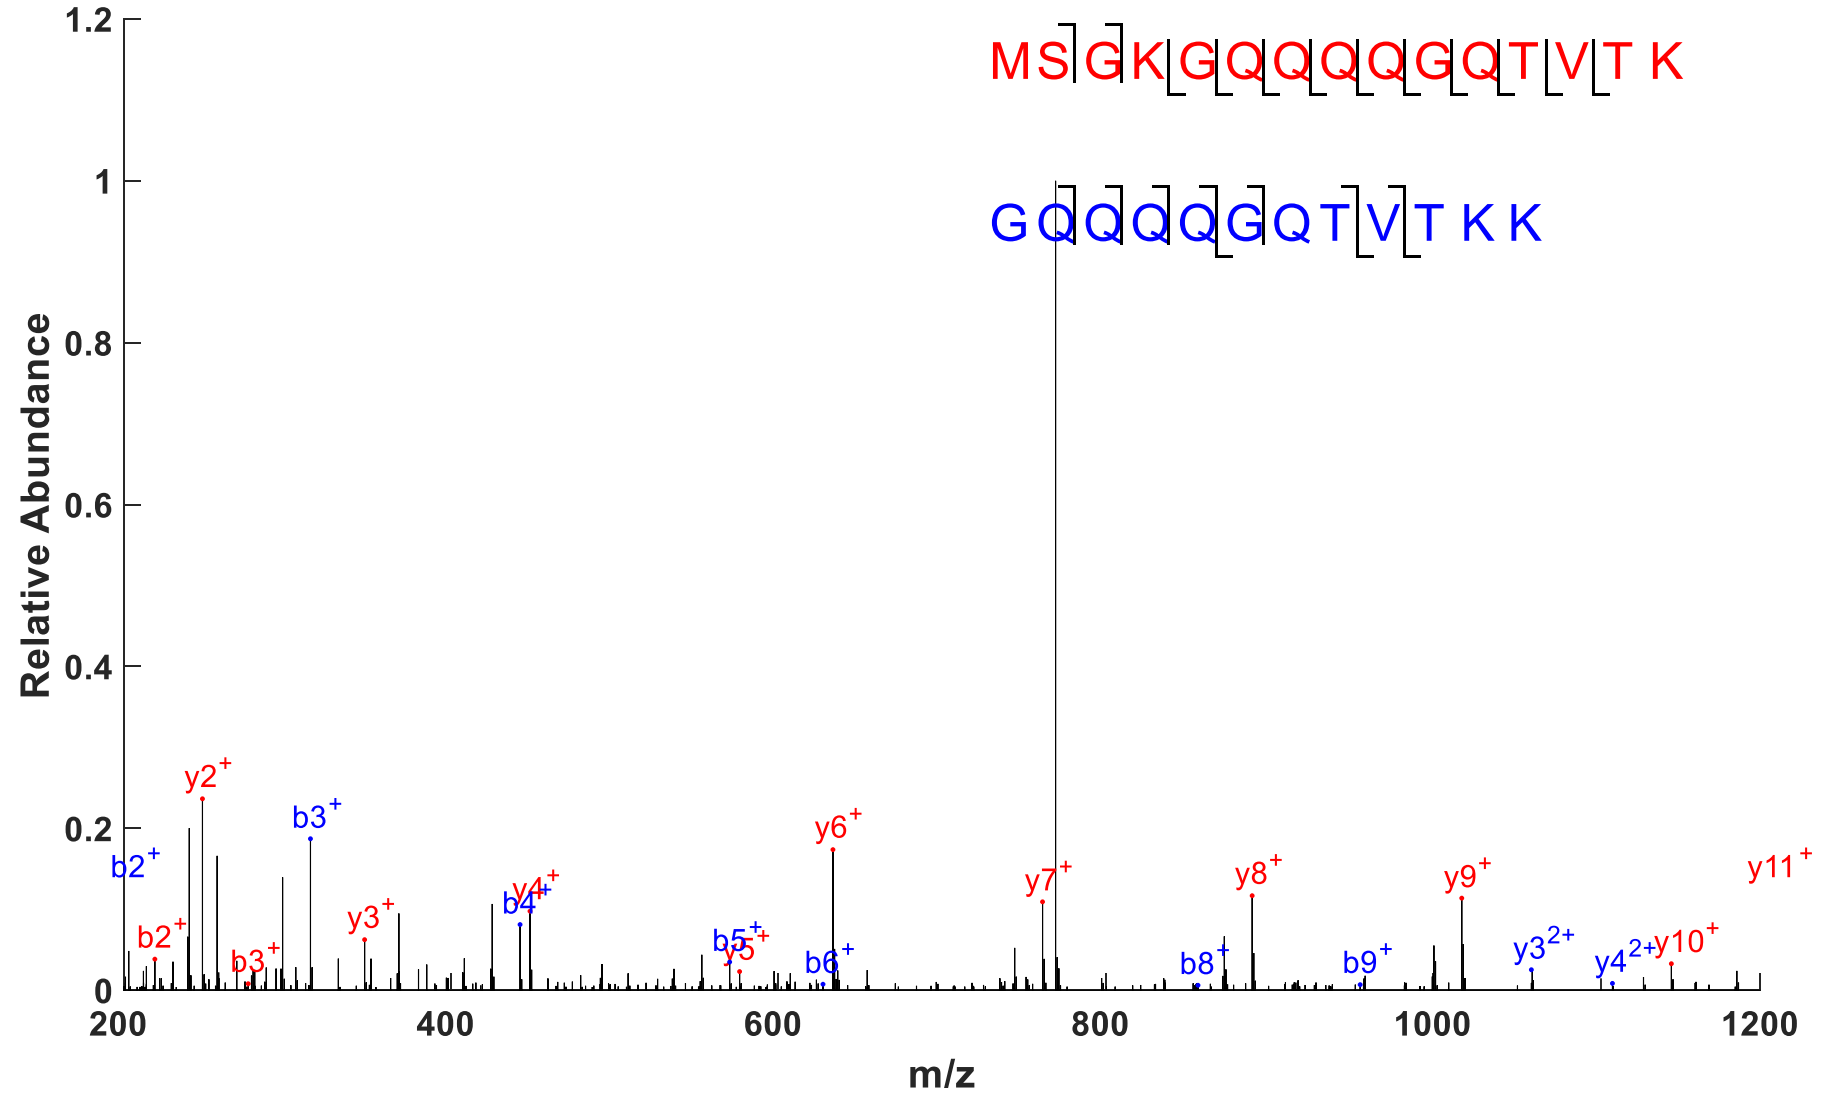

Protein N dimer cross link (6) K237 – K248.

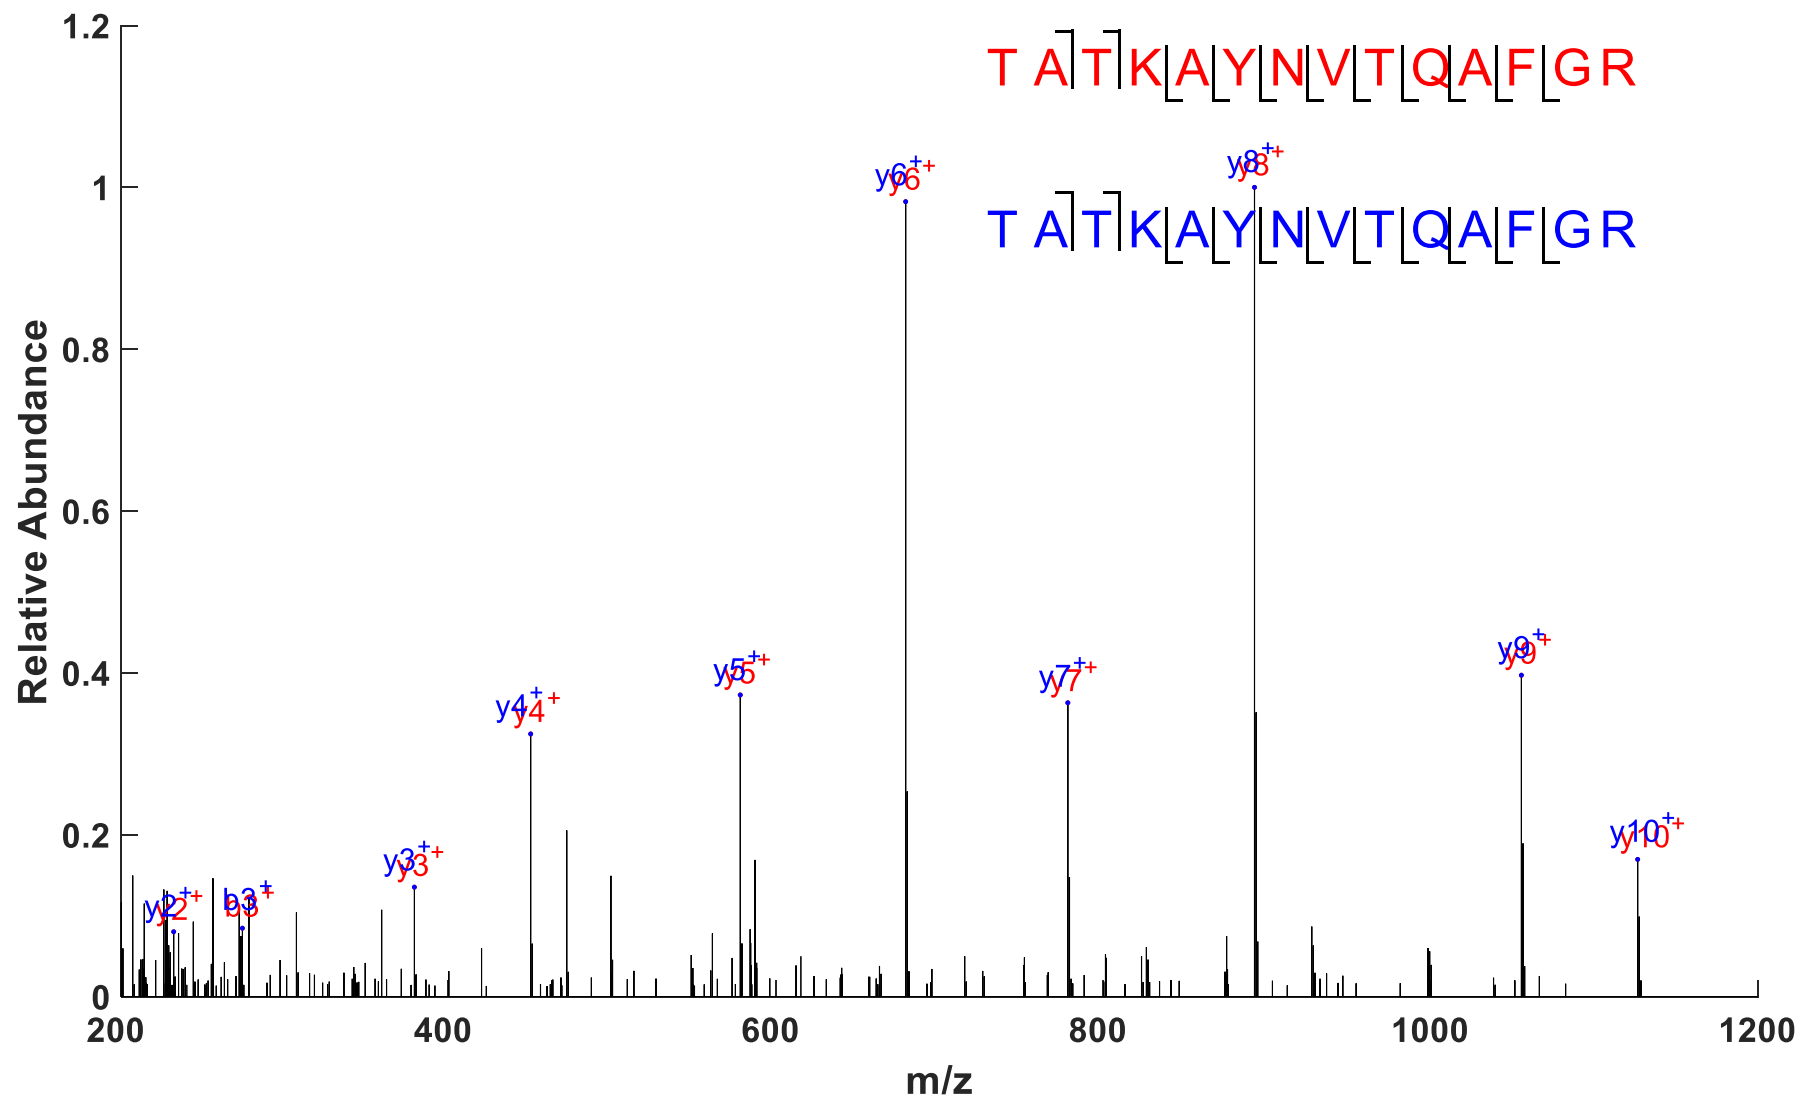

Protein N dimer cross link (7) K266 – K266.

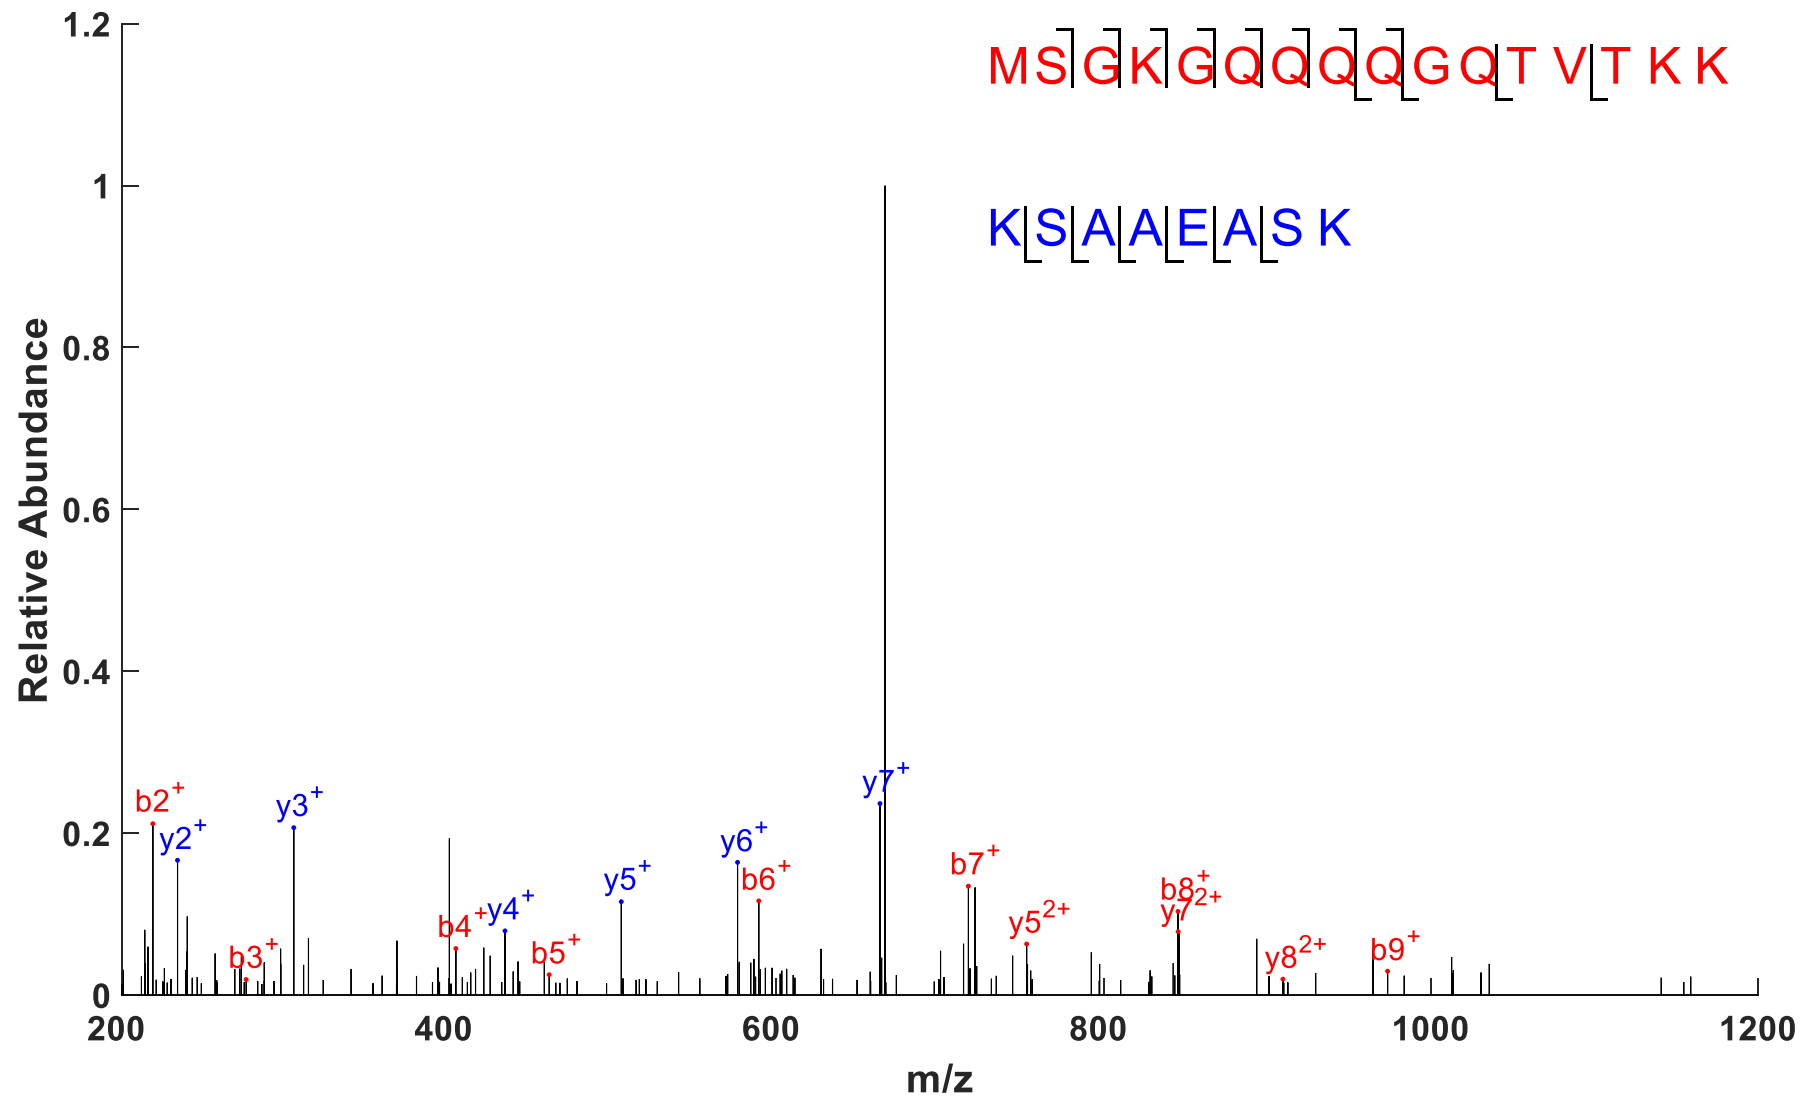

Protein N dimer cross link (8) K248 – K249.



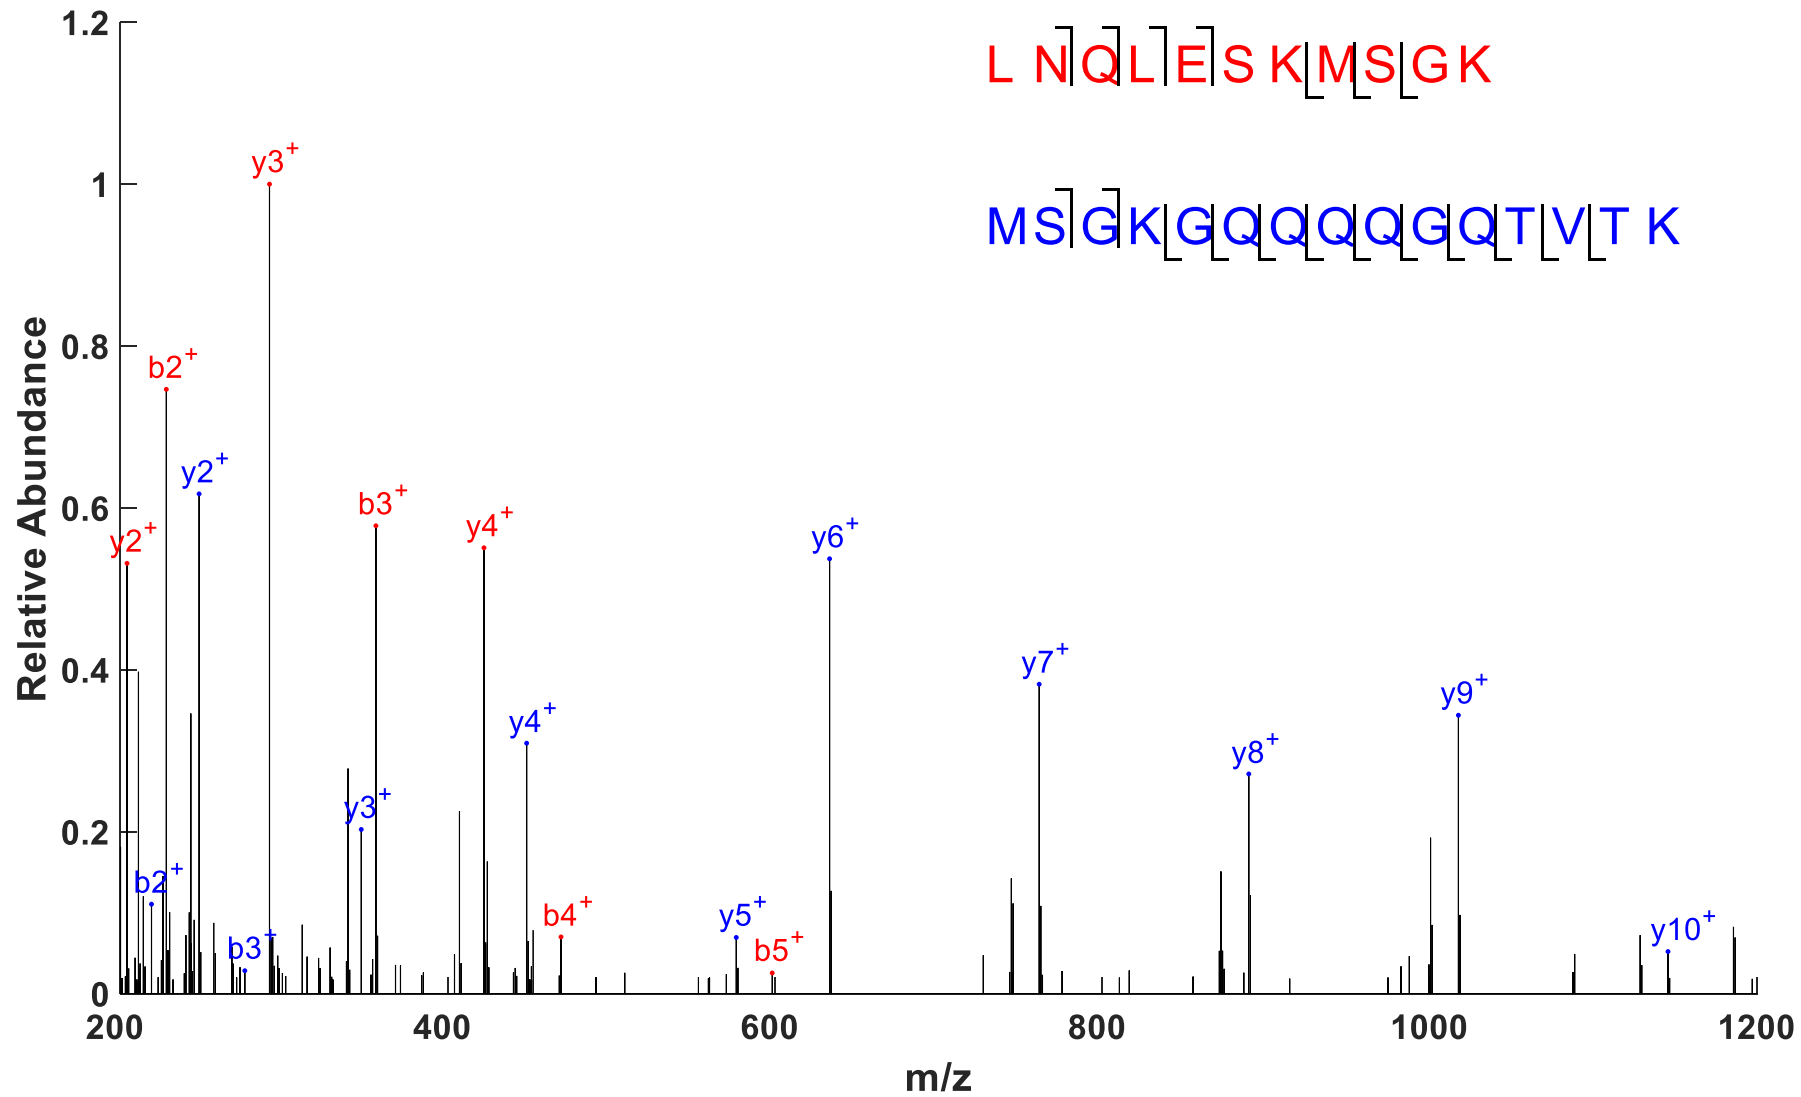

Protein N dimer cross link (9) K233 – K237.

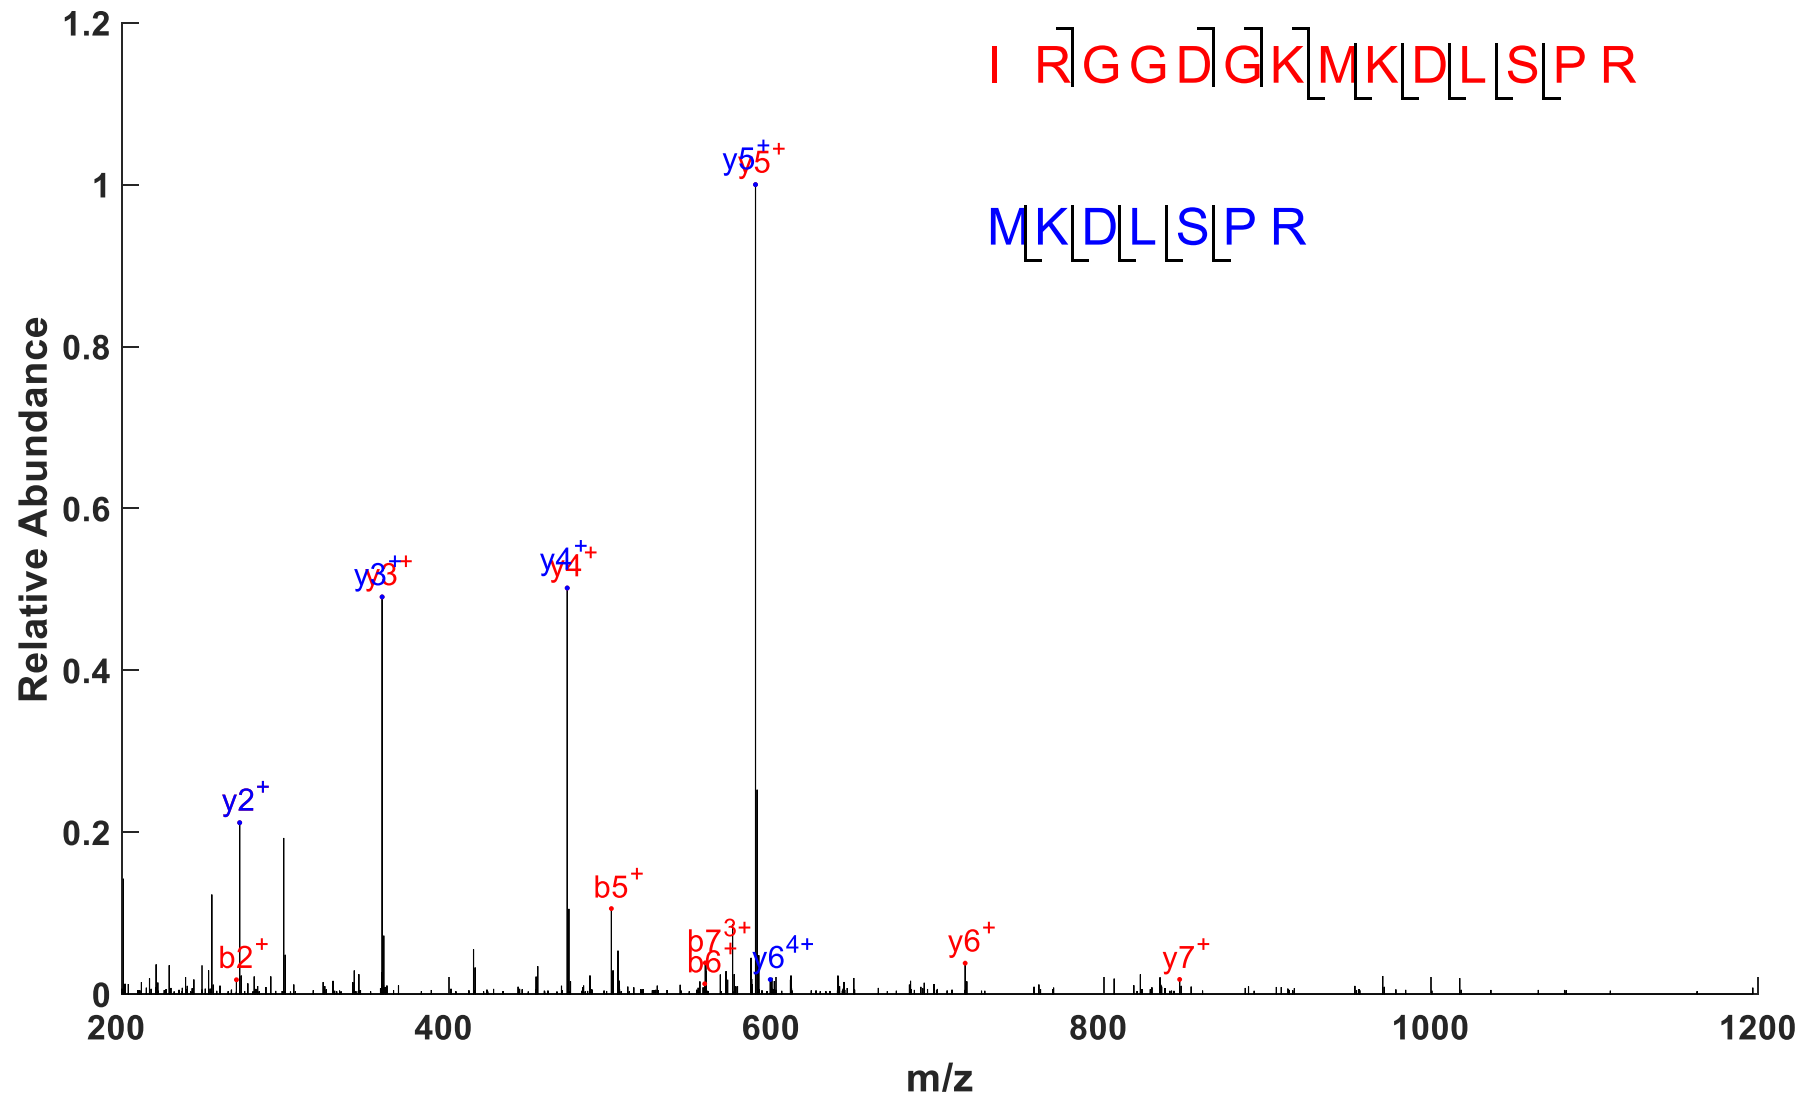

Protein N dimer cross link (10) K100 – K102.
